# Supplementary material for: Morphology controlled Cu3BiS3 nanostructures: superior electrocatalytic sensing of organic nitro compounds
Source: Royal Society of Chemistry journal article supplement (doi:10.1039/d4na00871e), 2024-12-20
Supplement: d4na00871e1.pdf [file d4na00871e1.pdf]

## Supporting Information

### Morphology Controlled $\text{Cu}_3\text{BiS}_3$ Nanostructures: Superior Electrocatalytic Sensing of organic nitro compounds

Manzoor Ahmad Pandit<sup>a,b,§</sup>, Dasari Sai Hemanth Kumar<sup>b,§</sup>, Mohan Varkolu<sup>b,c</sup>, and Krishnamurthi Muralidharan<sup>b,\*</sup>

<sup>a</sup>Materials Genome Institute, Shanghai University, Shanghai 200444, China.

<sup>b</sup>School of Chemistry, University of Hyderabad, Hyderabad 500046, India.

<sup>c</sup>Department of Chemistry, College of Engineering, Koneru Lakshmaiah Education Foundation, RVS Nagar, Azziz Nagar (PO), Moinabad Road, Hyderabad-500075, Telanagana, India.

\*Email: [murali@uohyd.ac.in](mailto:murali@uohyd.ac.in)

§Both the authors contributed equally.

| S. No. | Title                                                                                                                                  | Page no. |
|--------|----------------------------------------------------------------------------------------------------------------------------------------|----------|
| S1     | High magnification FESEM and SAED patterns of $\text{Cu}_3\text{BiS}_3$ with DBU, DABCO and DBN as bases.                              | 2        |
| S2     | Average particle size distribution plots                                                                                               | 2        |
| S3     | EDAS of $\text{Cu}_3\text{BiS}_3$ .                                                                                                    | 3        |
| S4     | BJH plots of $\text{Cu}_3\text{BiS}_3$ nanomaterials.                                                                                  | 3        |
| S5     | UV-visible DRS of $\text{Cu}_3\text{BiS}_3$ .                                                                                          | 4        |
| S6     | CV in the absence and presence of 4-NP, and linear plots of scan rate vs. current for the three morphologies-spheres, rods, and worms. | 4        |
| S7     | CV at different pH with 2,4-DNP for the three different morphologies. The linear fit responses of different pH (5 - 9).                | 5        |
| S8     | CV at different scan rates with 2,4-DNP. The corresponding linear plots of scan rates vs. current of 2,4-DNP.                          | 5        |
| S9     | The corresponding current vs. concentration linear plots of 4-NP and 2,4-DNP for three catalysts.                                      | 6        |
| S10    | Interference studies for three catalysts catalysts spheres, rods, and worms respectively.                                              | 6        |

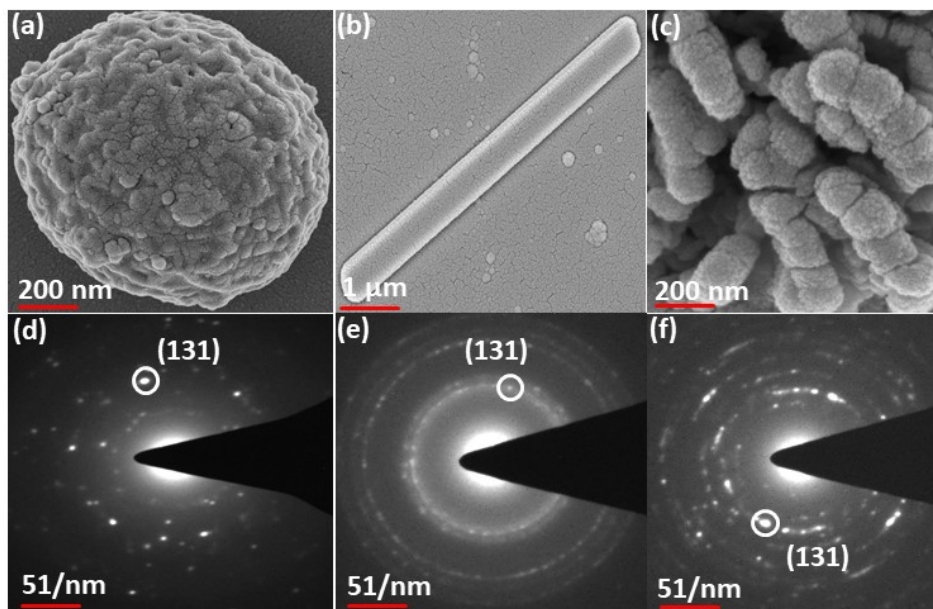

Figure S1. Showing high magnified FESEM and SAED patterns of  $\text{Cu}_3\text{BiS}_3$

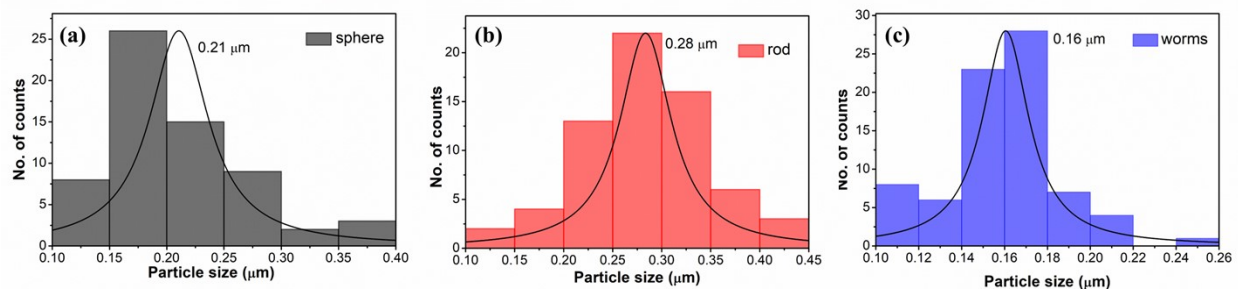

Figure S2. Average particle size distribution plots of (a) Spheres of  $\text{Cu}_3\text{BiS}_3$ -DBU, (b) rods of  $\text{Cu}_3\text{BiS}_3$ -DABCO, (c) worm-like morphology of  $\text{Cu}_3\text{BiS}_3$ -DBN.

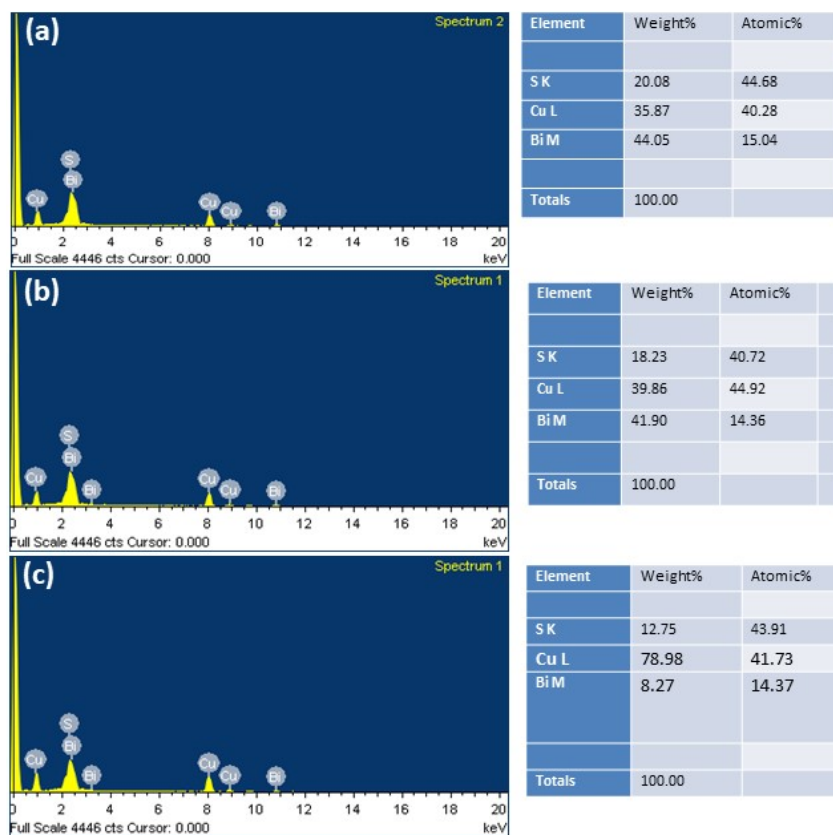

Figure S3. Showing EDAS of (a) spheres, (b) rods, and (c) worms of  $\text{Cu}_3\text{BiS}_3$  catalysts

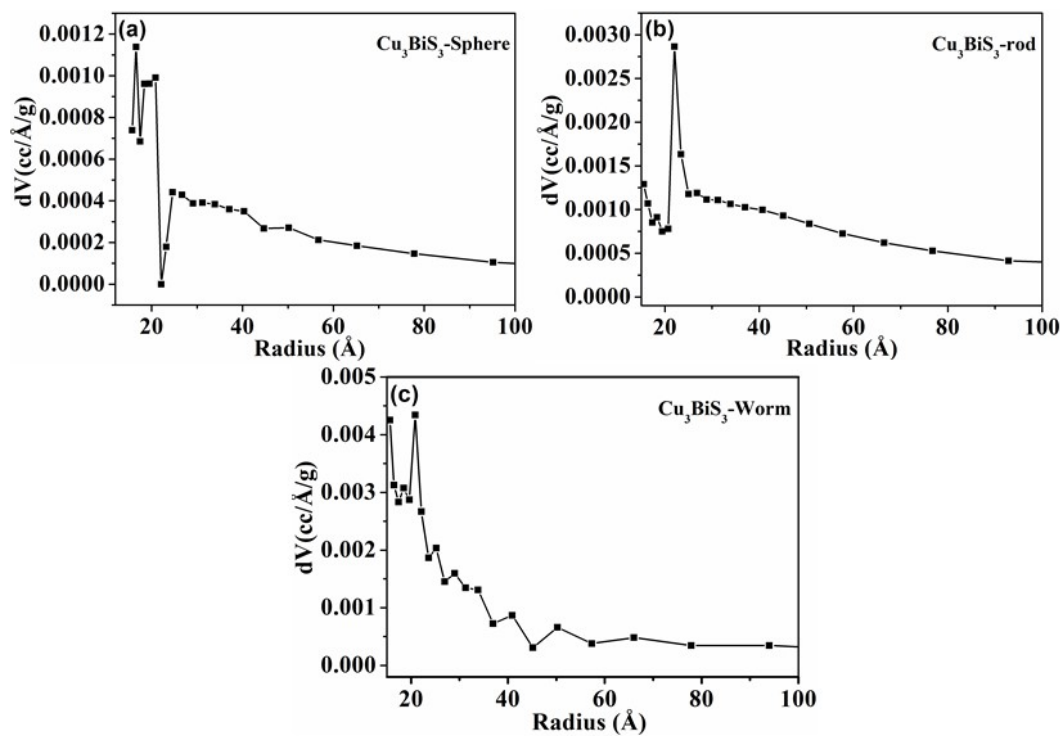

Figure S4. BJH plots representing pore size distribution of  $\text{Cu}_3\text{BiS}_3$  nanomaterials.

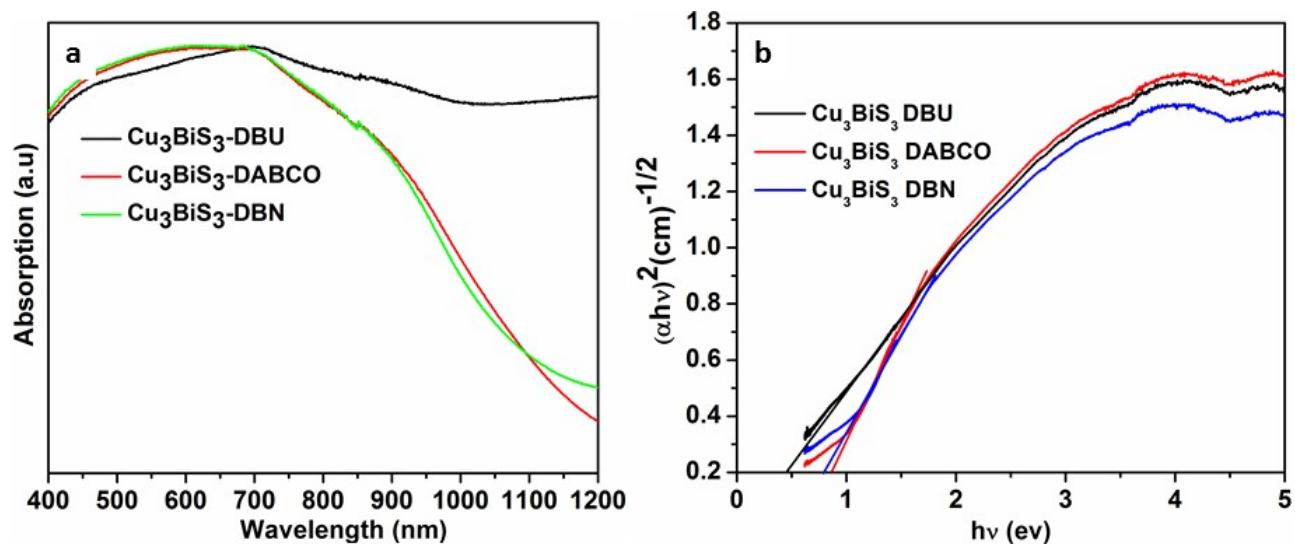

Figure S5. Showing UV-visible DRS system of  $\text{Cu}_3\text{BiS}_3$  (a) Absorption spectrum (b) band gap.

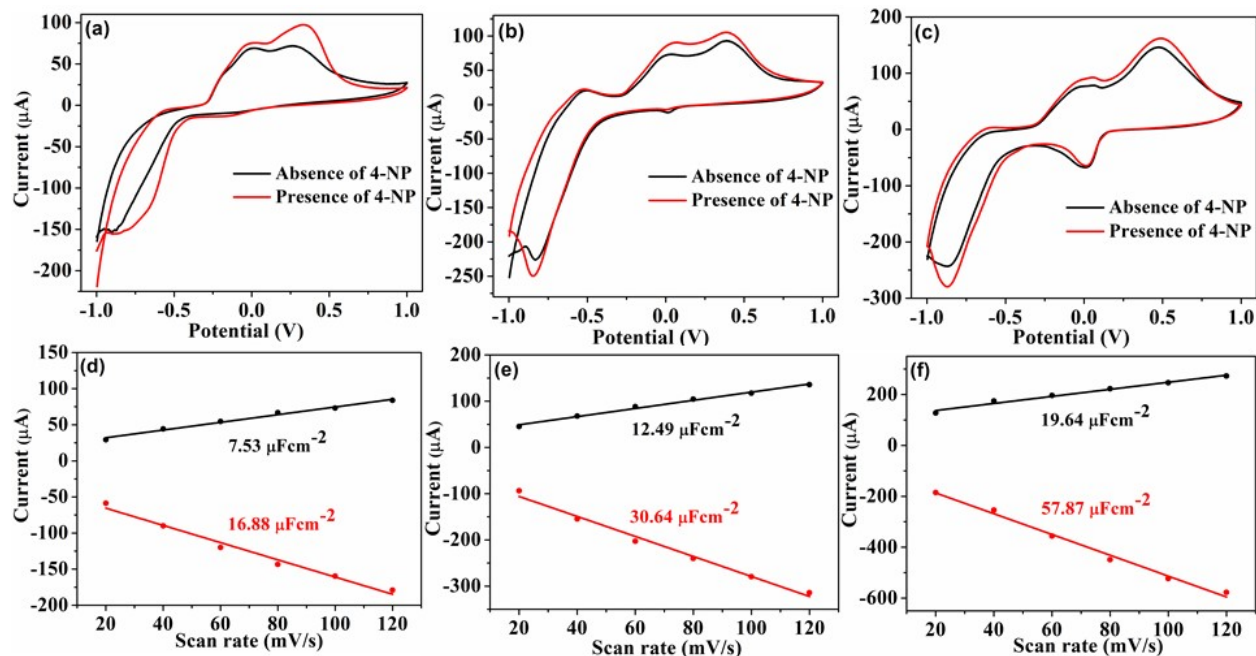

Figure S6. (a-c) CV in the absence and presence of 4-NP for the three different morphologies-spheres, rods, and worms. (d-f) Linear plots of scan rate vs. current.

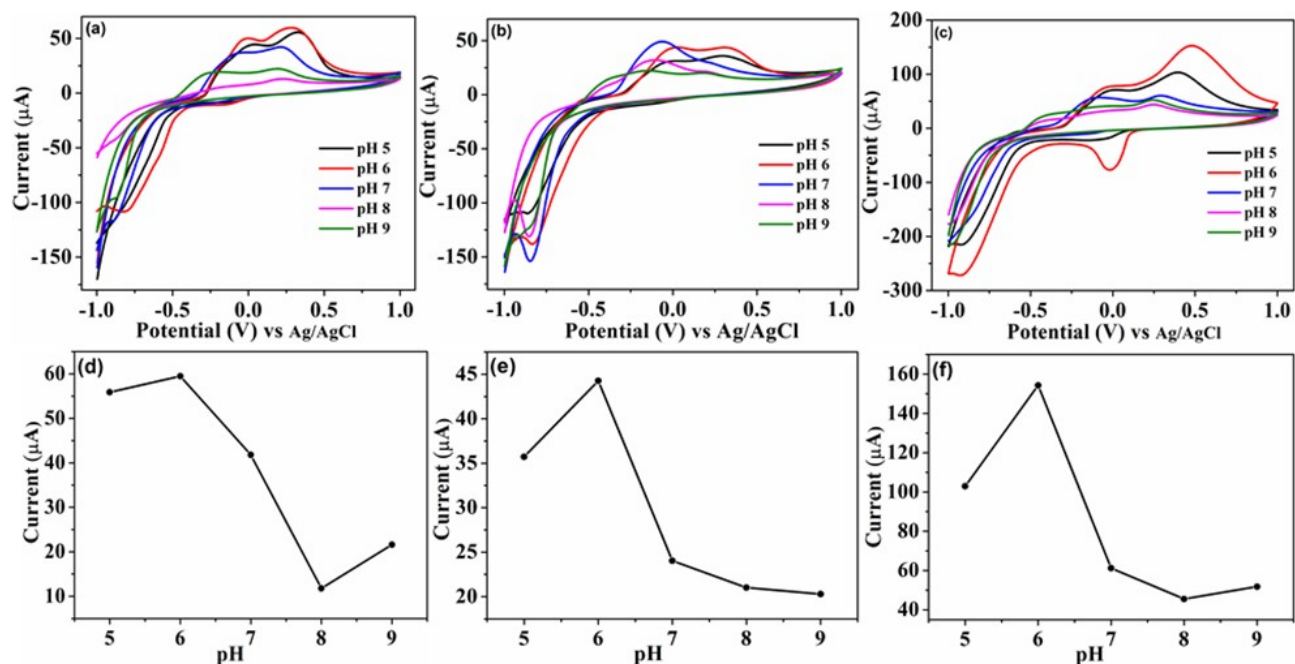

Figure S7. (a-c) CV at different pH with 2,4-DNP for the three different morphologies-spheres, rods, and worms. (d-f) The linear fit responses of different pH (5 - 9) for the three morphologies.

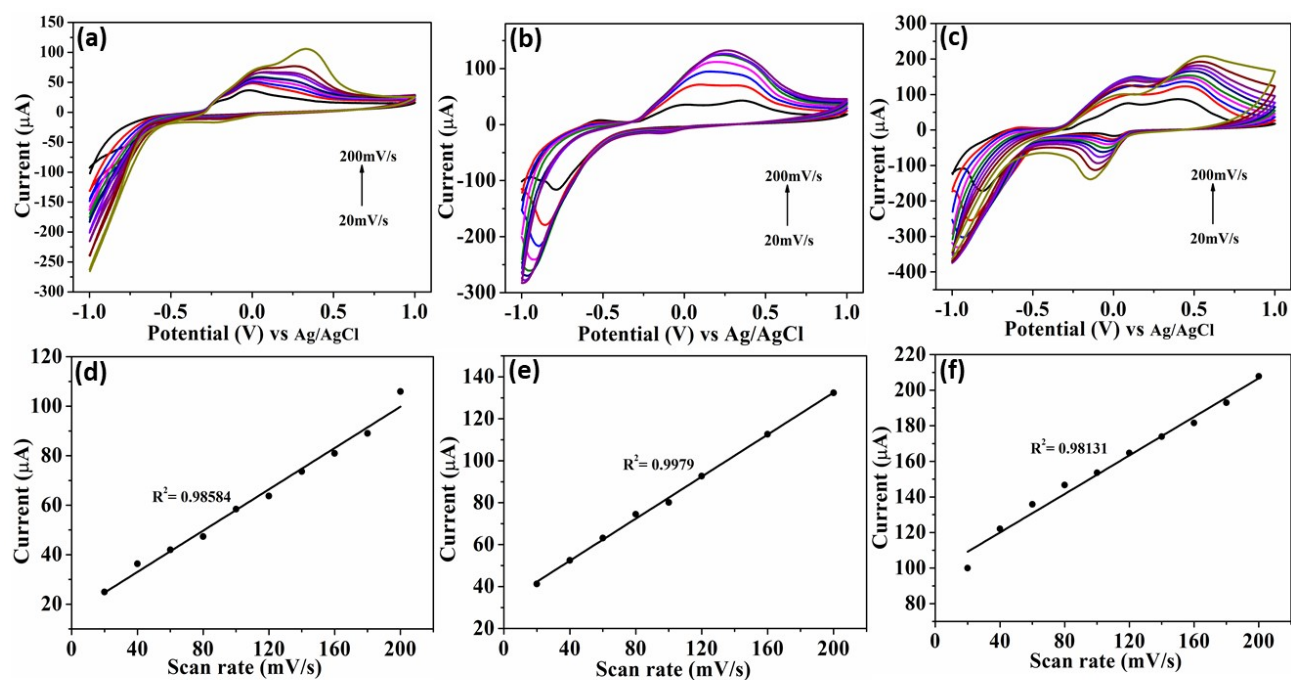

Figure S8. (a-c) CV of  $\text{Cu}_3\text{BiS}_3$  with 2,4-DNP at different scan rates. (d-f) The corresponding linear plots of scan rates vs current of 2,4-DNP.

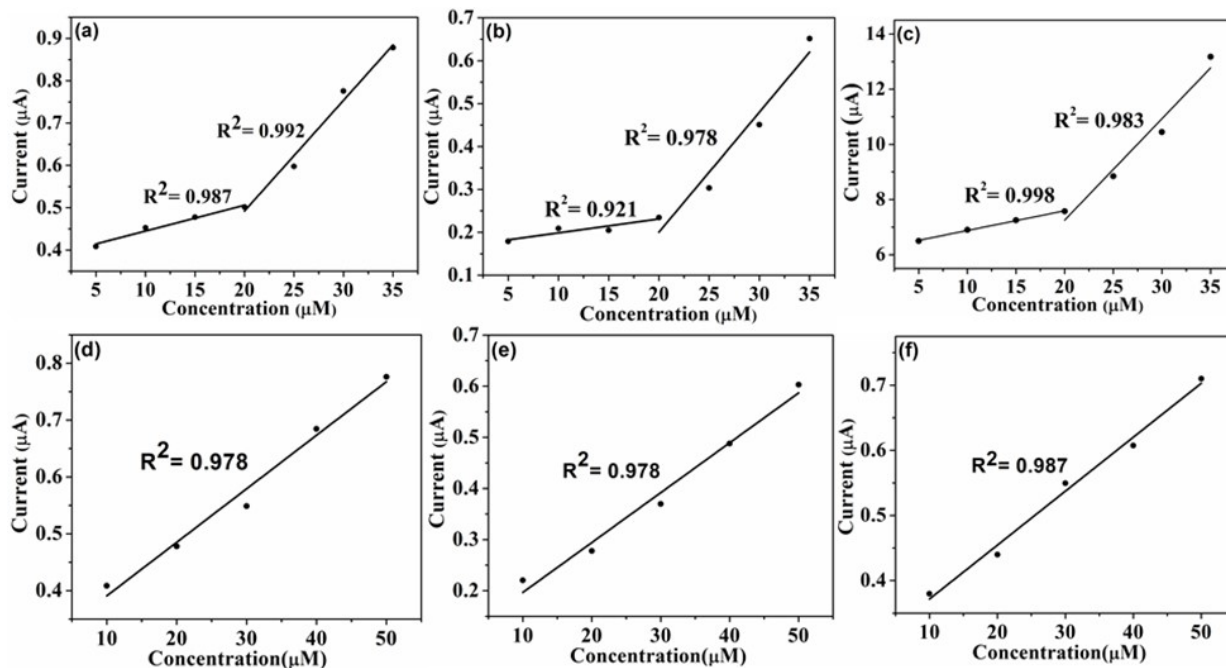

Figure S9. The corresponding current vs. concentration linear plots of (a-c) 4-NP, and (d-f) 2,4-DNP for three catalysts spheres, rods, and worms respectively.

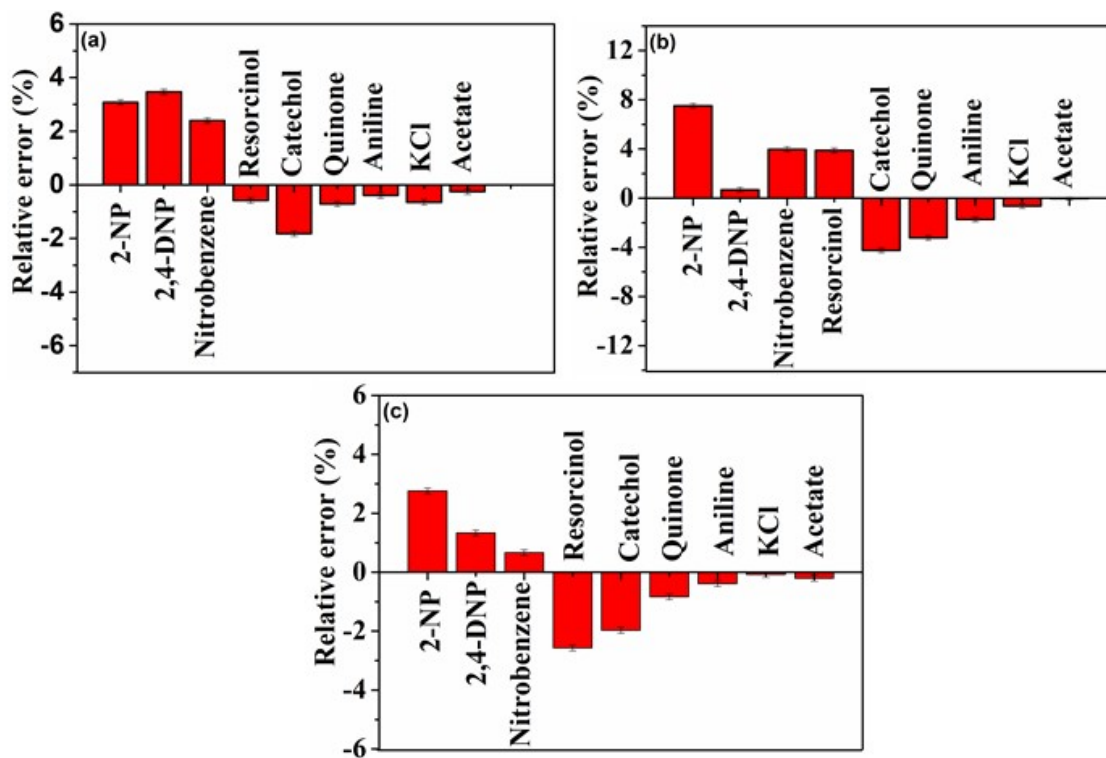

Figure S10. Interference studies for three  $\text{Cu}_3\text{BiS}_3$  catalysts: spheres, rods, and worms respectively.
